# Supplementary material
Source: PubMed Central journal article supplement (PMC5387995)

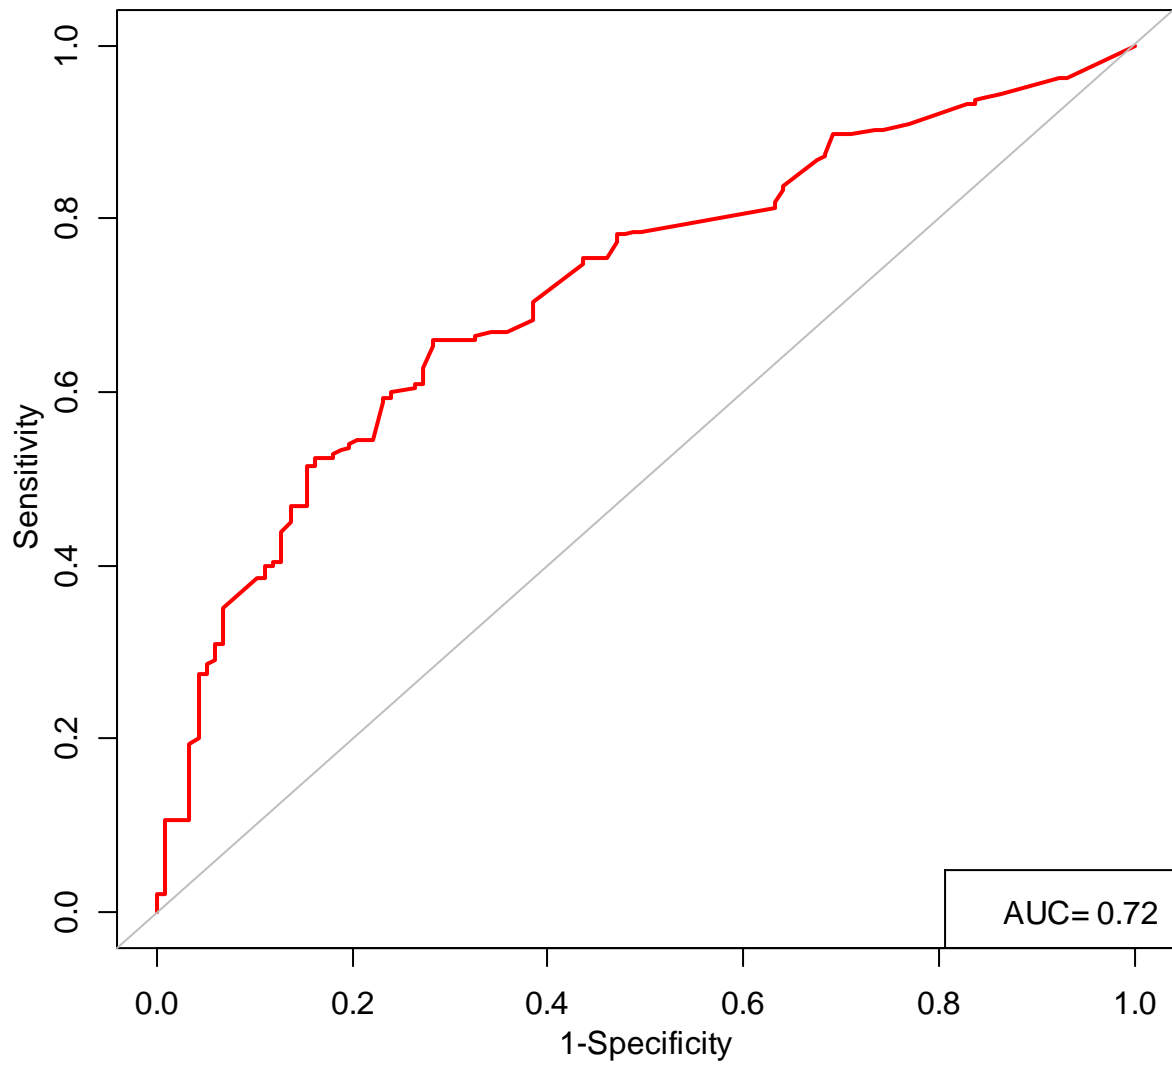

Supplement: NIHMS853727-supplement.pdf [file NIHMS853727-supplement.pdf]
